# Supplementary material for: The Liver-Stage Plasmodium Infection Is a Critical Checkpoint for Development of Experimental Cerebral Malaria
Source: PubMed Central journal article supplement (PMC6837997; doi:10.3389/fimmu.2019.02554), 2019-11-01
Supplement: Data_Sheet_1.pdf [file Data_Sheet_1.pdf]

## Supplementary Material

# The Liver-stage *Plasmodium* Infection Is a Critical Checkpoint for Development of Experimental Cerebral Malaria

Yuko Sato, Stefanie Ries, Werner Stenzel, Simon Fillatreau, Kai Matuschewski

### Content:

- Supplementary Figures S1 –S7

Sato *et al.*, Supplementary Figure S1

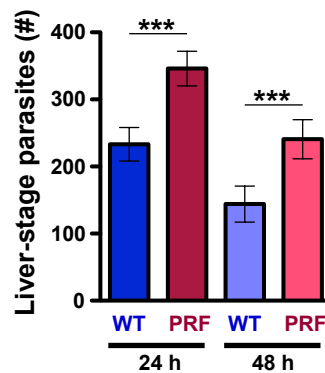

**Supplementary Figure 1:** *In vitro* development of liver-stage parasites.

Hepatoma cells were incubated with sporozoites for 24 and 48 h before fixation and stained with an anti-*PbHSP70* antibody. Results represent mean values ( $\pm$  SD) of at least three independent experiments with duplicate or triplicate samples. \*\*\*,  $P < 0.001$  (Mann-Whitney test).

Sato *et al.*, Supplementary Figure S2

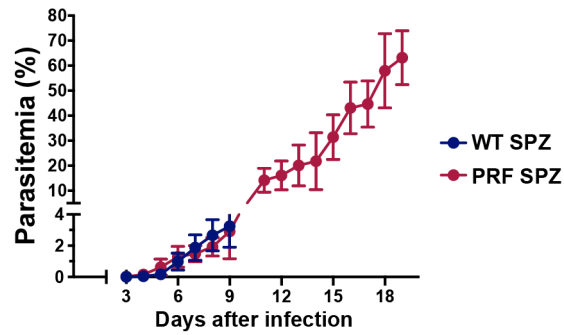

**Supplementary Figure 2. PRF hemocoel sporozoite infection leads to hyper-parasitemia.**

Parasitemia was followed for a longer period of time for a proportion of PRF hemocoel sporozoite infected animals ( $n=22$  each). Mice were sacrificed when they presented symptoms of ECM (WT sporozoite-infected) or severe anemia (PRF sporozoite-infected).

Sato et al., Supplementary Figure S3

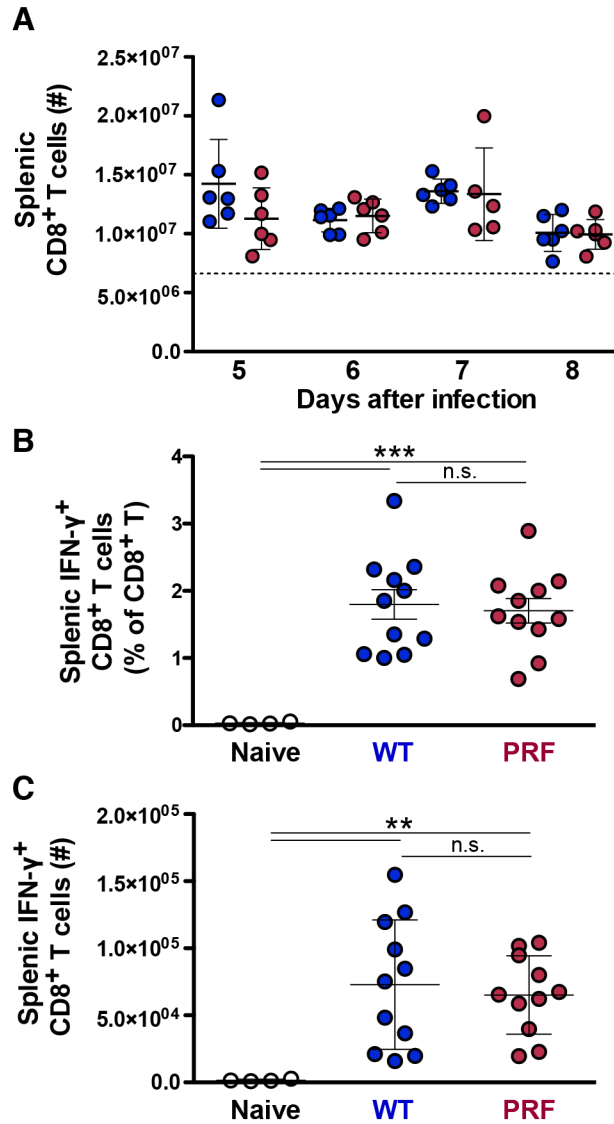

**Supplementary Figure 3. Quantification of total and antigen-experienced CD8<sup>+</sup> T cells in the spleens of infected mice.**

**(A)** Time course of total splenic CD8<sup>+</sup> T cells. Mice were infected with WT (blue) or PRF (red) sporozoites by intravenous injection ( $n=6$  each), and splenocytes were isolated and analyzed at indicated time points. The dotted line represents the average total CD8<sup>+</sup> T cells from naïve animals. Results represent mean values ( $\pm$  SD) ( $n=6$  each). Differences were non-significant (Mann-Whitney test).

**(B-C)** Quantification of splenic CD8<sup>+</sup> T cells expressing intracellular IFN- $\gamma$  after re-stimulation with *Pb*GAP50<sub>40-48</sub> peptide. Shown are percentages out of splenic CD8<sup>+</sup> T cells **(B)** and numbers **(C)** of this population in the spleen. Splenic leukocytes were stained for intracellular IFN- $\gamma$  production with *Pb*GAP50<sub>40-48</sub> peptide. Results represent mean values ( $\pm$  SD) ( $n=10$  each for infected mice;  $n=4$  for naïve mice). Samples were isolated 8 days after infection. Differences in IFN- $\gamma$ -secreting antigen-specific CD8<sup>+</sup> T cell numbers from WT *versus* PRF infected animals are non-significant. \*\*,  $P<0.01$ ; \*\*\*,  $P<0.001$  (Mann-Whitney test).

Sato *et al.*, Supplementary Figure S4

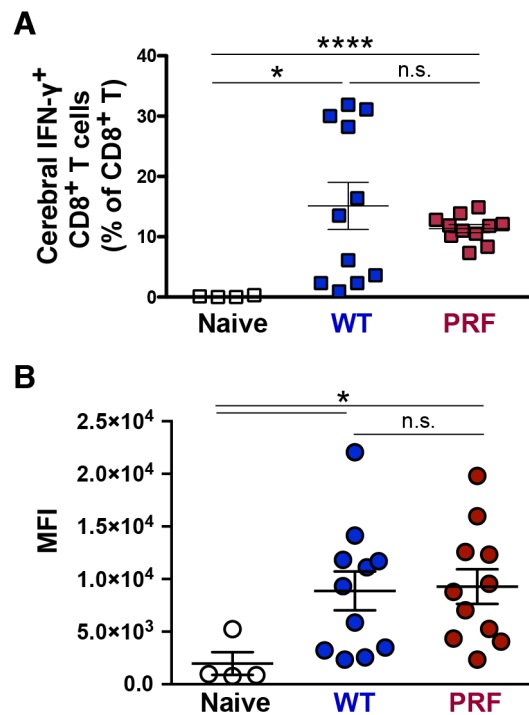

**Supplementary Figure 4. Quantification of total and antigen-experienced CD8<sup>+</sup> T cells in the brain of infected mice.**

Quantification of cerebral CD8<sup>+</sup> T cells expressing intracellular IFN- $\gamma$  after re-stimulation with *Pb*GAP50<sub>40-48</sub> peptide. The scatter dot plots represent mean values ( $\pm$  SD) from samples isolated on day 8 from three independent experiments ( $n=10$  each for infected mice;  $n=4$  for naïve mice).

**(A)** Shown are percentages out of cerebral CD8<sup>+</sup> T cells of this population in the brain. Total percentage of IFN- $\gamma$ -secreting antigen-specific CD8<sup>+</sup> T cells from WT versus PRF infected animals is non-significant. \*,  $P<0.05$ ; \*\*\*\*,  $P<0.0001$  (Mann-Whitney test).

**(B)** Quantification of mean fluorescence intensity (MFI) of IFN- $\gamma$  secreted from antigen-specific CD8<sup>+</sup> T cells in the brain by flow cytometry. n.s., non-significant; \*,  $P<0.05$  (Mann-Whitney test).

Sato *et al.*, Supplementary Figure S5

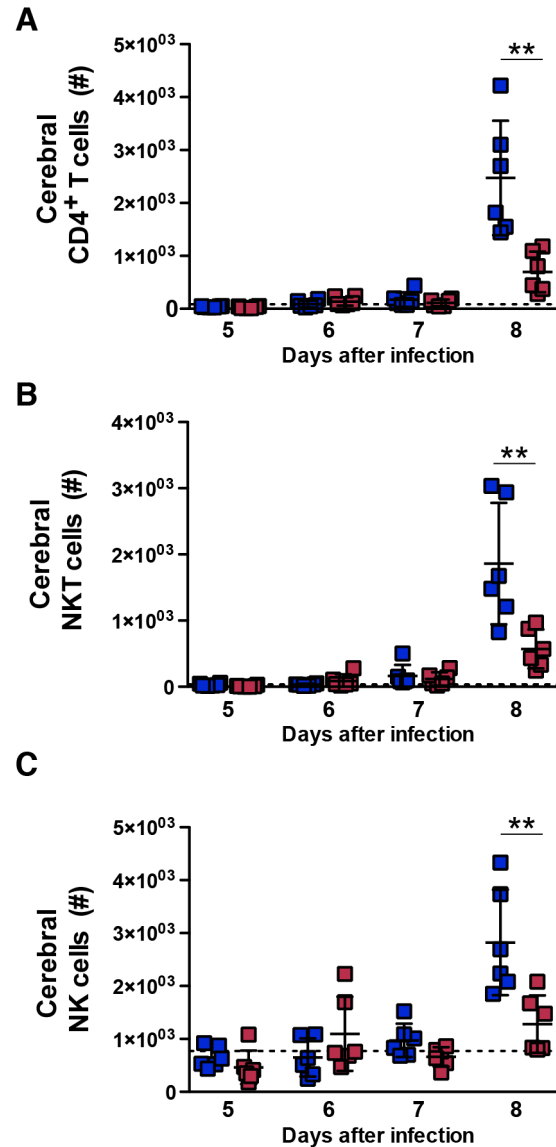

**Supplementary Figure 5. Quantification of CD4<sup>+</sup> T, NKT and NK cells in the brains of infected mice.**

(A-C) Time course of total cerebral lymphocyte counts during the late stages of blood infection. Mice were infected with WT (blue) or PRF (red) sporozoites by intravenous injection ( $n=6$  each), and cerebral lymphocytes were isolated and analyzed at indicated time points. The dotted line represents the mean corresponding cerebral lymphocyte number in all naïve animals ( $n=16$ ). Shown are (A) total CD4<sup>+</sup> T cell, (B) total NKT cell and (C) total NK cell numbers. The scatter dot plots represent mean values ( $\pm$  SD). \*\*,  $P<0.01$  (Mann-Whitney test).

Sato *et al.*, Supplementary Figure S6

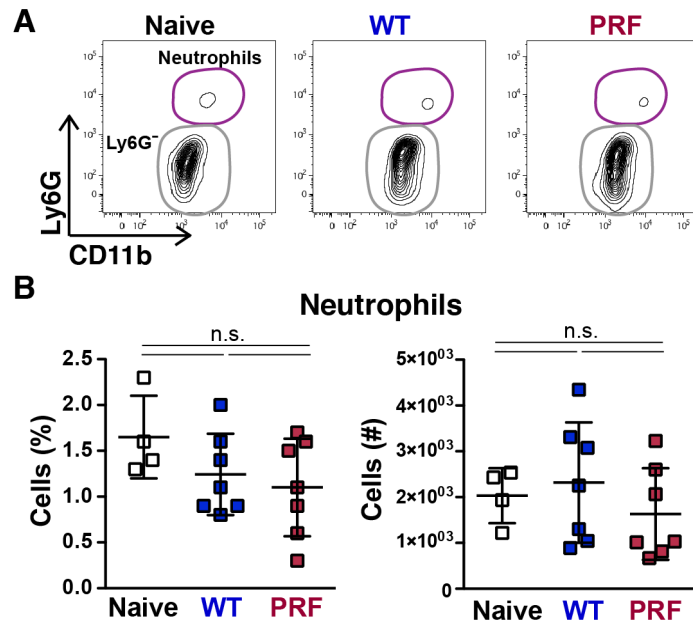

**Supplementary Figure 6. Neutrophil infiltration in the brain does not significantly increase on day 8 after sporozoite-induced infection.**

**(A)** Representative contour plots from day 8 after infection showing Ly6G vs. CD11b expression on myeloid cells obtained from naïve mice (left), and mice infected with WT (center) and PRF (right) sporozoites. Purple circles indicate gating of neutrophils, Ly6G<sup>+</sup>CD45<sup>med/lo</sup>CD11b<sup>+</sup> cells and grey circles are Ly6G<sup>-</sup> myeloid cells, Ly6G<sup>-</sup>CD45<sup>med/lo</sup>CD11b<sup>+</sup> cells.

**(B)** Analysis of neutrophils in the brain. Shown are percentage (left) and numbers (right) of this population in the brain. The scatter dot plots represent mean values ( $\pm$  SD) from samples ( $n=4-7$ ) isolated 8 days after infection from two independent experiments. Differences were non-significant (Mann-Whitney test).

Sato *et al.*, Supplementary Figure S7

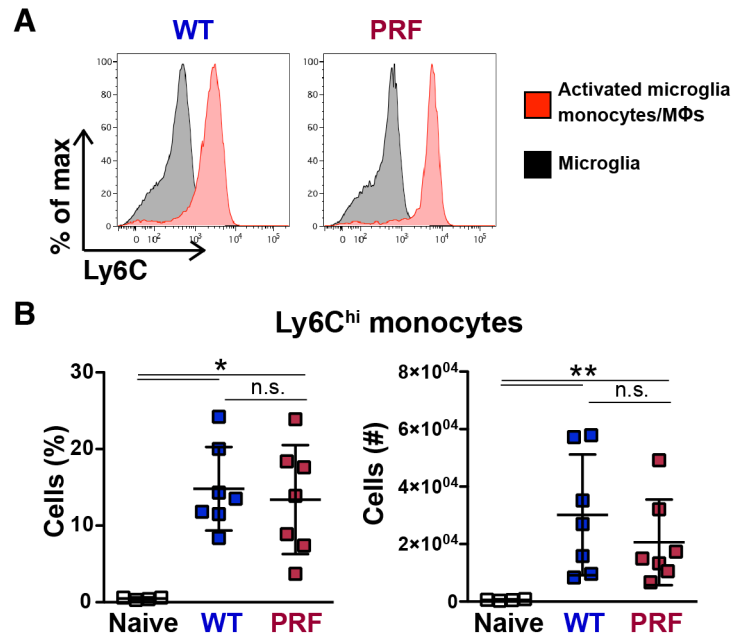

**Supplementary Figure 7. Brain-infiltrating myeloid cells are primarily Ly6C<sup>hi</sup> inflammatory monocytes.**

**(A)** Histogram of Ly6C staining on the Ly6G<sup>-</sup> myeloid population from mice infected with WT (left) and PRF (right) sporozoites. Gated microglia (grey histogram) display low Ly6C expression; while the gated activated microglia, monocytes and macrophages (red histogram) express high levels of Ly6C.

**(B)** Quantification of infiltrating Ly6C<sup>hi</sup> monocytes, defined as Ly6C<sup>hi</sup> CD45<sup>med</sup> Ly6G<sup>-</sup> CD11b<sup>+</sup> cells. The scatter dot plots represent mean values ( $\pm$  SD) from samples ( $n=4-7$ ) isolated 8 days after infection from two independent experiments. Shown are total percentage (left) and numbers (right) of this cell population in the brain. n.s., non-significant; \*,  $P<0.05$ ; \*\*,  $P<0.01$  (Mann-Whitney test).
